# Supplementary material for: Monocyte Chemotactic Protein-1 (MCP1) Accumulation in Human Osteoclast Precursor Cultures
Source: MDPI journal article supplement (doi:10.3390/life12060789), 2022-05-26
Supplement: s1 [file s1]

## Article

# Monocyte Chemotactic Protein-1 (MCP1) Accumulation in Human Osteoclast Precursor Cultures

Nigel A. Morrison <sup>1,\*</sup> and Mark R. Forwood <sup>2</sup><sup>1</sup> School of Medical Science, Griffith University, Queensland, Australia; N.Morrison@griffith.edu.au<sup>2</sup> School of Medical Science, Griffith University, Queensland, Australia; M.Forwood@griffith.edu.au

\* Correspondence: N.Morrison@griffith.edu.au

## Supplementary Materials

**Citation:** Morrison, N.A.; Forwood, M.R. Monocyte Chemotactic Protein-1 (MCP1) Accumulation in Human Osteoclast Precursor Cultures. *Life* **2022**, *12*, 789. <https://doi.org/10.3390/life12060789>

Academic Editor: Christina Piperi

Received: 17 March 2022

Accepted: 23 May 2022

Published: 26 May 2022

**Publisher's Note:** MDPI stays neutral with regard to jurisdictional claims in published maps and institutional affiliations.

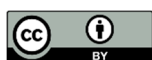

**Copyright:** © 2022 by the authors. Licensee MDPI, Basel, Switzerland. This article is an open access article distributed under the terms and conditions of the Creative Commons Attribution (CC BY) license (<https://creativecommons.org/licenses/by/4.0/>).

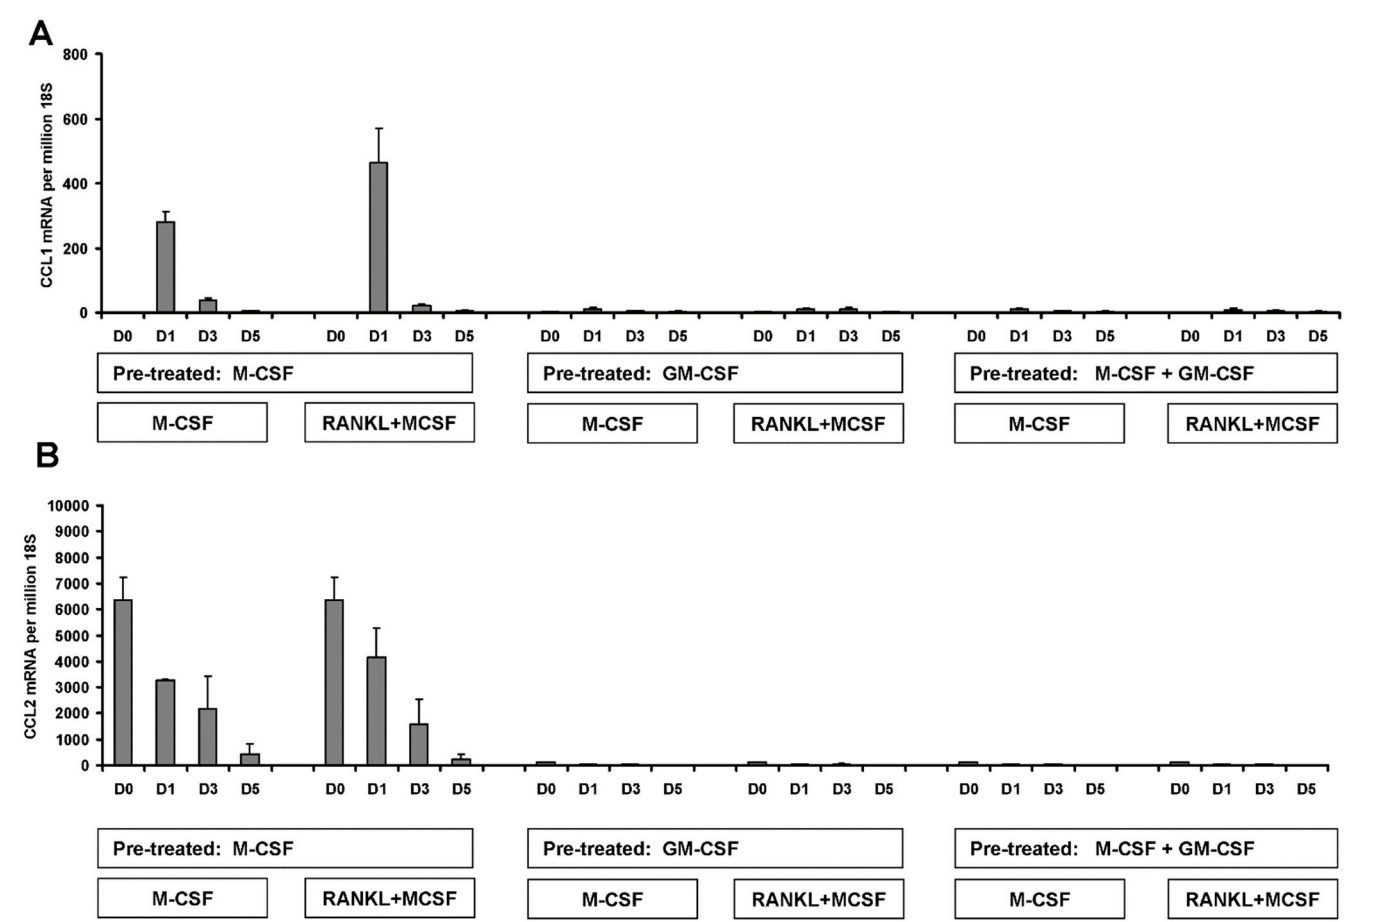

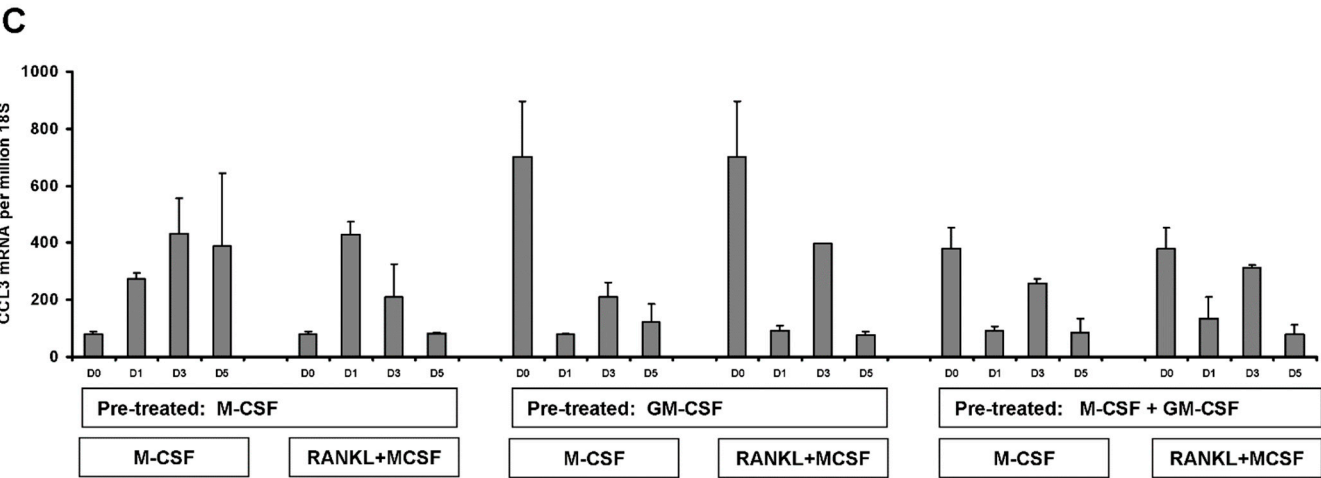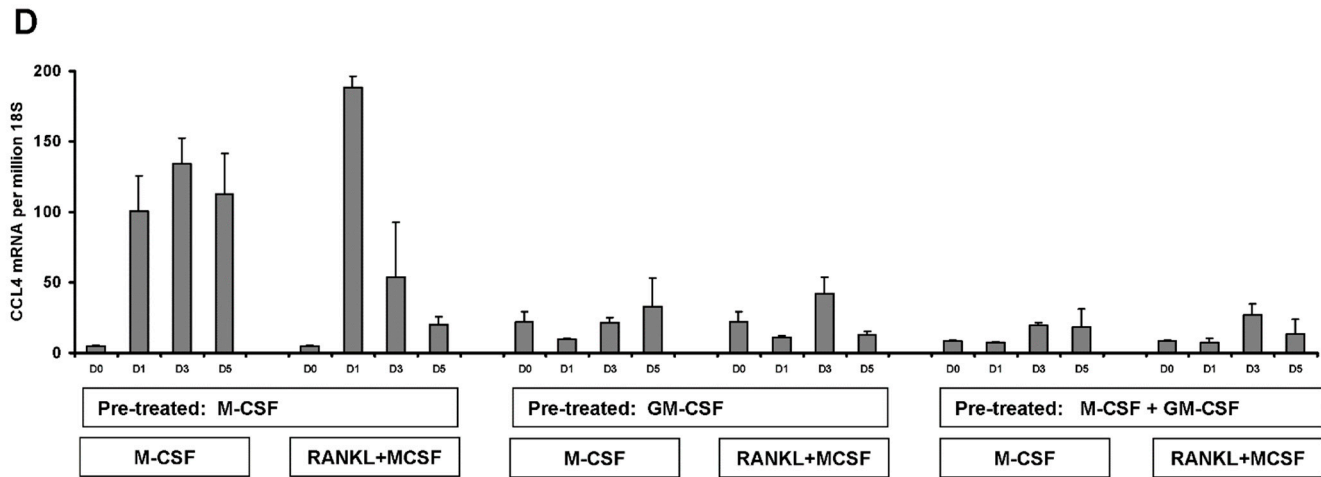

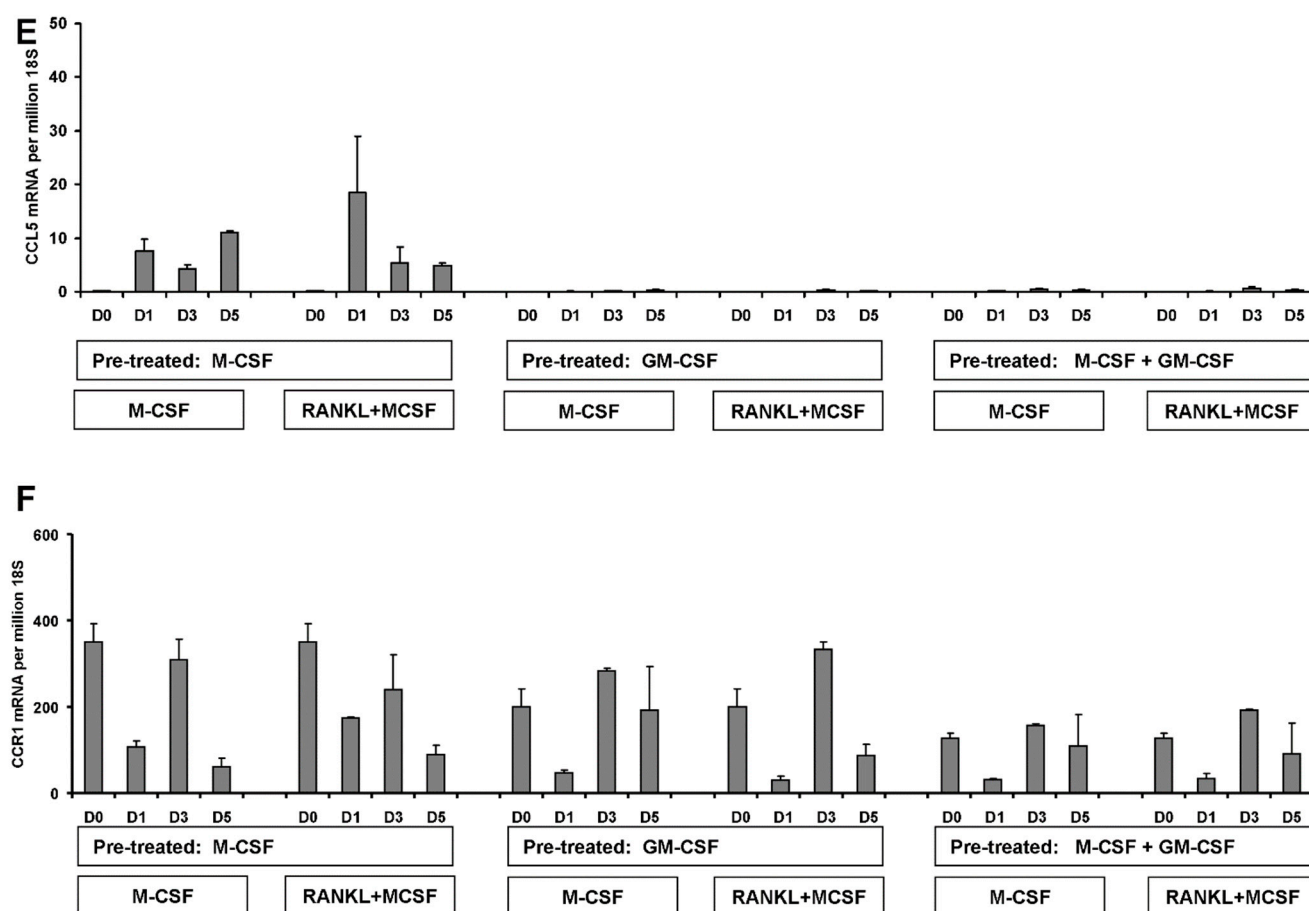

**Figure S1.** Chemokine mRNA transcript changes according to culture conditions. Each graph shows the outcome of six different conditions, with gene expression measured at zero time (D0), and then at days 1, 3 and 5 (D1, D3 and D5, respectively). Pre-treatment for 5 days is indicated in the first row of boxes containing the legend “Pre-treated”. Post treatment is indicated in the second set of boxes labelled either M-CSF or RANKL+M-CSF. **A.** CCL1 mRNA levels are very low except at day one after media change and only in those cultures pre-treated with M-CSF. **B.** MCP1 (CCL2) mRNA transcript levels are the highest of all assayed genes and are substantially suppressed by GM-CSF pre-treatment (zero time). High MCP1 mRNA levels in M-CSF pre-treated cells decline steadily over time. In GM-CSF pre-treated cells, no recovery of MCP1 mRNA levels was observed when cells were cultured in M-CSF alone or M-CSF in combination with RANKL. **C.** CCL3 (MIP1 $\alpha$ ) mRNA levels are quite different at zero time (D0) according to pre-treatment with highest levels in GM-CSF treated cells. In cells pre-treated with M-CSF, an increase in expression is observed at days 1, 3 and 5 in both post-treatments of M-CSF and MCSF and RANKL. In GM-CSF pre-treated cells, CCL3 mRNA levels drop after day zero. **D.** CCL4 (MIP1 $\beta$ ) has very low transcript levels at day zero (immediately after the pre-treatment period). In M-CSF post-treatment cultures and M-CSF and RANKL post-treatment cultures, CCL4 (MIP1 $\beta$ ) shows induced gene expression effect in a pattern similar to that of CCL3 (MIP1 $\alpha$ ). **E.** CCL5 (RANTES) mRNA levels are extremely low with highest levels in cultures pre-treated with M-CSF. **F.** CCR1 mRNA transcript levels are not particularly altered and appear to vary in all cultures.
